# Supplementary material for: Microwave-induced combustion for petroleum coke digestion: a promising sample preparation strategy for subsequent elemental determination
Source: Royal Society of Chemistry journal article supplement (doi:10.1039/d2ay00223j), 2022-01-01
Supplement: d2ay00223j1.pdf [file d2ay00223j1.pdf]

## Supplementary Material

**Table S1.** Operational conditions of ICP OES for elements determination ((I) are atomic and (II) ionic lines).

| Parameter                                      | Conditions used     |
|------------------------------------------------|---------------------|
| RF power (W)                                   | 1400                |
| Plasma gas flow rate (L min <sup>-1</sup> )    | 15.0                |
| Auxiliary gas flow rate (L min <sup>-1</sup> ) | 2.00                |
| Nebulizer gas flow rate (L min <sup>-1</sup> ) | 0.800               |
| Sample flow rate, mL min <sup>-1</sup>         | 1.50                |
| Spray chamber                                  | Cyclonic L7525      |
| Nebulizer                                      | Concentric SeaSpray |
| View                                           | Axial               |
| Wavelength, nm                                 |                     |
| Ag                                             | 328,068 (I)         |
| Al                                             | 396.153 (I)         |
| Ba                                             | 455.403 (II)        |
| Ca                                             | 393,366 (II)        |
| Cd                                             | 214,440 (II)        |
| Co                                             | 238,892 (II)        |
| Cu                                             | 324.752 (I)         |
| Fe                                             | 259.939 (II)        |
| Mg                                             | 280,271 (II)        |
| Mn                                             | 257.610 (II)        |
| Mo                                             | 202,031 (II)        |
| Na                                             | 589,592 (I)         |
| Ni                                             | 221,648 (II)        |
| Pb                                             | 220,353 (II)        |
| Sr                                             | 407,771 (II)        |
| V                                              | 309,310 (II)        |
| Zn                                             | 213.857 (I)         |
| Yb                                             | 369.419 (II)*       |

\* Internal standard.

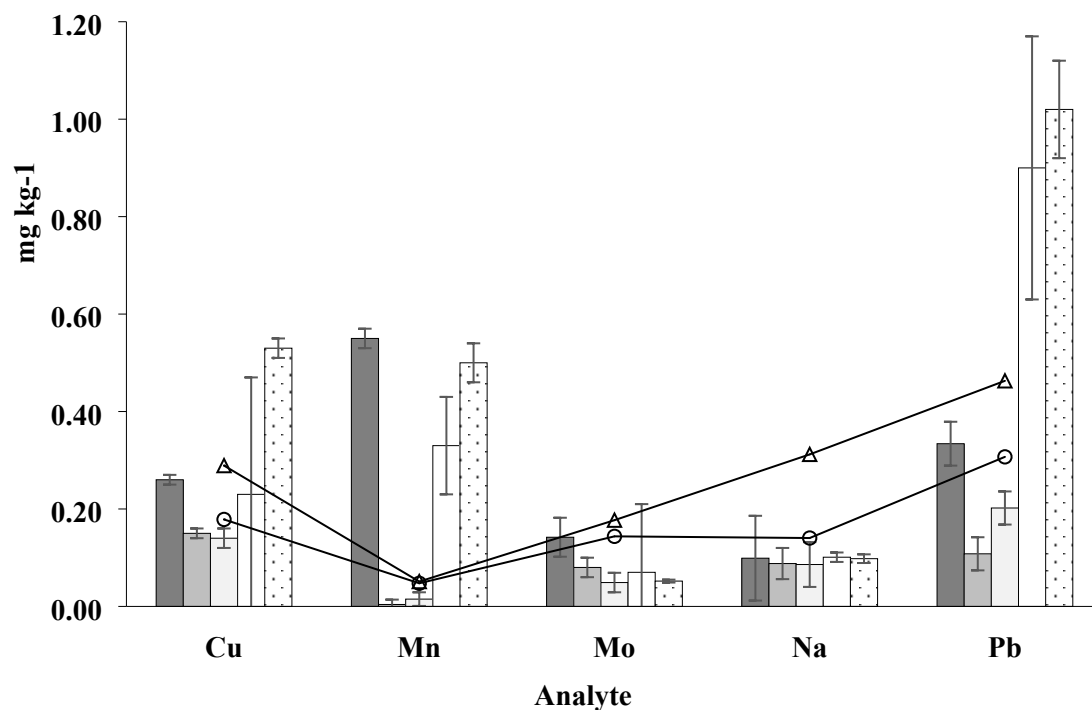

**Figure S1.** Relationship among LOD, LOQ and analytes concentration ( $n = 3$ ), in  $\text{mg kg}^{-1}$ , after digestion by MIC using  $4.2 \text{ mol L}^{-1} \text{ HNO}_3$  as absorbing. The circles represent the LOD, the triangles represent the LOQ and the bars are the concentration of analytes for the following samples:  sample 1,  sample 2,  sample 3,  sample 5 and  sample 6. Data for Cu, Mn, Mo, Na and Pb.

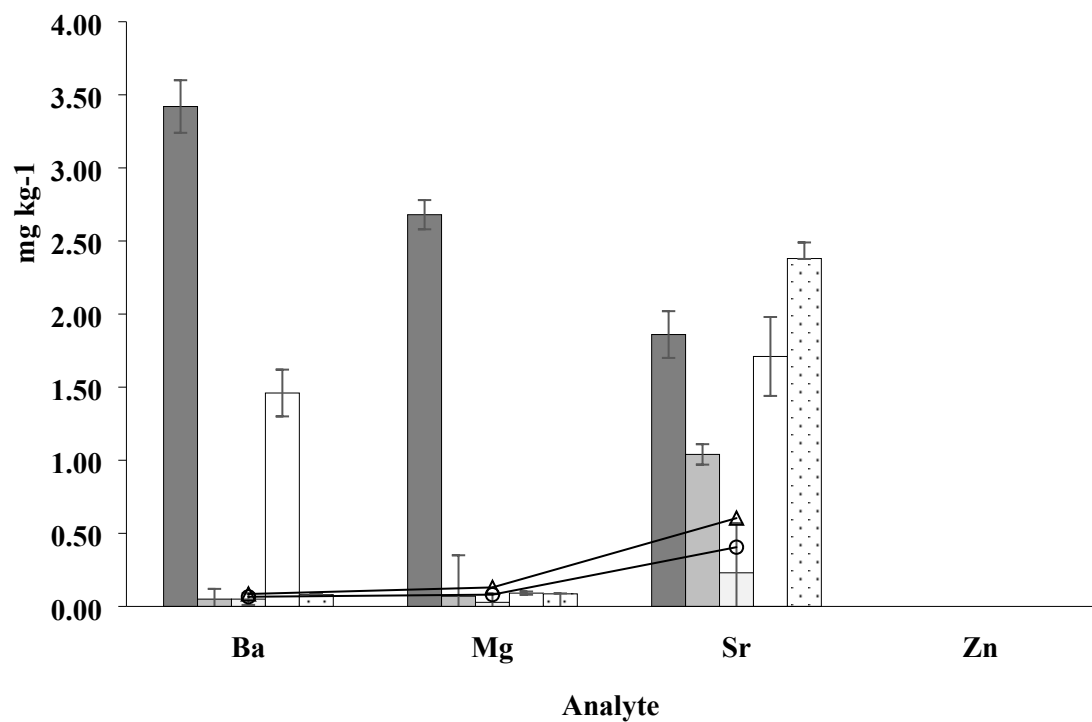

**Figure S2.** Relationship among LOD, LOQ and analytes concentration ( $n = 3$ ), in  $\text{mg kg}^{-1}$ , after digestion by MIC using  $4.2 \text{ mol L}^{-1} \text{ HNO}_3$  as absorbing. The circles represent the LOD, the triangles represent the LOQ and the bars are the concentration of analytes for the following samples:  sample 1,  sample 2,  sample 3,  sample 5 and  sample 6. Data for Ba, Mg and Sr.
